# Supplementary material for: 6-Bromo-2-hydroxypyridinate-bridged Paddlewheel-Type Dirhodium Complex Isomers: Synthesis, Crystal Structures, Electrochemical Properties, and Structure-Dependent Absorption Properties
Source: MDPI journal article supplement (doi:10.3390/inorganics12030070), 2024-02-26
Supplement: s1 [file s1]

## Supplementary Materials

### 6-Bromo-2-hydroxypyridinate-bridged Paddlewheel-type Dirhodium Complex Isomers: Synthesis, Crystal Structures, electrochemical properties, and Structure-dependent Absorption Properties

Kozo Sato,<sup>1</sup> Natsumi Yano,<sup>1,2</sup> Yusuke Kataoka<sup>1,\*</sup>

<sup>1</sup> Department of Chemistry, Graduate School of Natural Science and Technology, Shimane University, 1060, Nishikawatsu, Matsue, Shimane 690-8504, Japan.

<sup>2</sup> Special Course in Science and Engineering, Graduate School of Natural Science and Technology, Shimane University, 1060, Nishikawatsu, Matsue, Shimane 690-8504, Japan.

#### Contents

Figure S1. Observed and simulated ESI-MS spectra of *trans*-2,2-[Rh<sub>2</sub>(bhp)<sub>4</sub>].

Figure S2. Observed and simulated ESI-MS spectra of 3, *I*-[Rh<sub>2</sub>(bhp)<sub>4</sub>].

Figure S3. <sup>1</sup>H NMR spectrum of *trans*-2,2-[Rh<sub>2</sub>(bhp)<sub>4</sub>] in DMSO-*d*<sub>6</sub>.

Figure S4. <sup>1</sup>H NMR spectrum of 3, *I*-[Rh<sub>2</sub>(bhp)<sub>4</sub>] in DMSO-*d*<sub>6</sub>.

Table S1. Selected bond lengths (Å) and angles (°) of *trans*-2,2-[Rh<sub>2</sub>(bhp)<sub>4</sub>].

Table S2. Selected bond lengths (Å) and angles (°) of 3, *I*-[Rh<sub>2</sub>(bhp)<sub>4</sub>](DMF)].

Table S3. Selected bond lengths (Å) and angles (°) of 3, *I*-[Rh<sub>2</sub>(bhp)<sub>4</sub>]<sub>2</sub>.

Table S4. Averaged bond lengths (Å) of optimized geometries of [Rh<sub>2</sub>(bhp)<sub>4</sub>] isomers.

Table S5. TDDFT results of *trans*-2,2-[Rh<sub>2</sub>(bhp)<sub>4</sub>] in CH<sub>2</sub>Cl<sub>2</sub>.

Table S6. TDDFT results of 3, *I*-[Rh<sub>2</sub>(bhp)<sub>4</sub>] in CH<sub>2</sub>Cl<sub>2</sub>.

Table S7. TDDFT results of 3, *I*-[Rh<sub>2</sub>(bhp)<sub>4</sub>] in DMF.

Table S8. TDDFT results of 3, *I*-[Rh<sub>2</sub>(bhp)<sub>4</sub>] in gas phase.

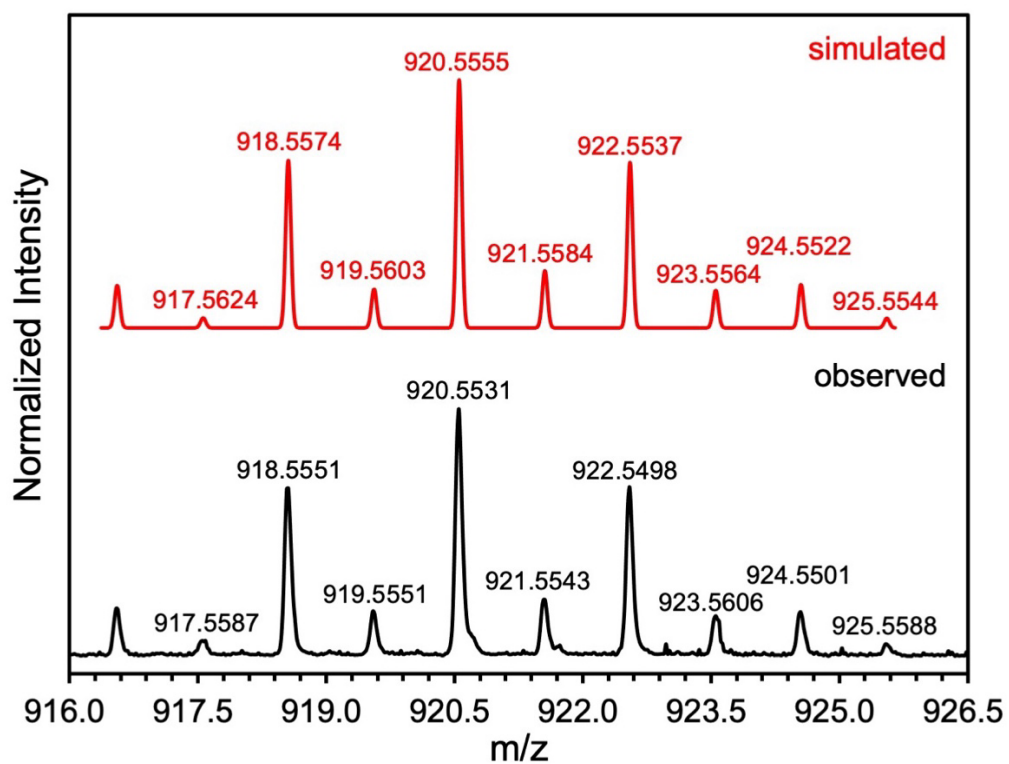

Figure S1. Observed and simulated ESI-MS spectra of *trans*-2,2-[Rh<sub>2</sub>(bhp)<sub>4</sub>].

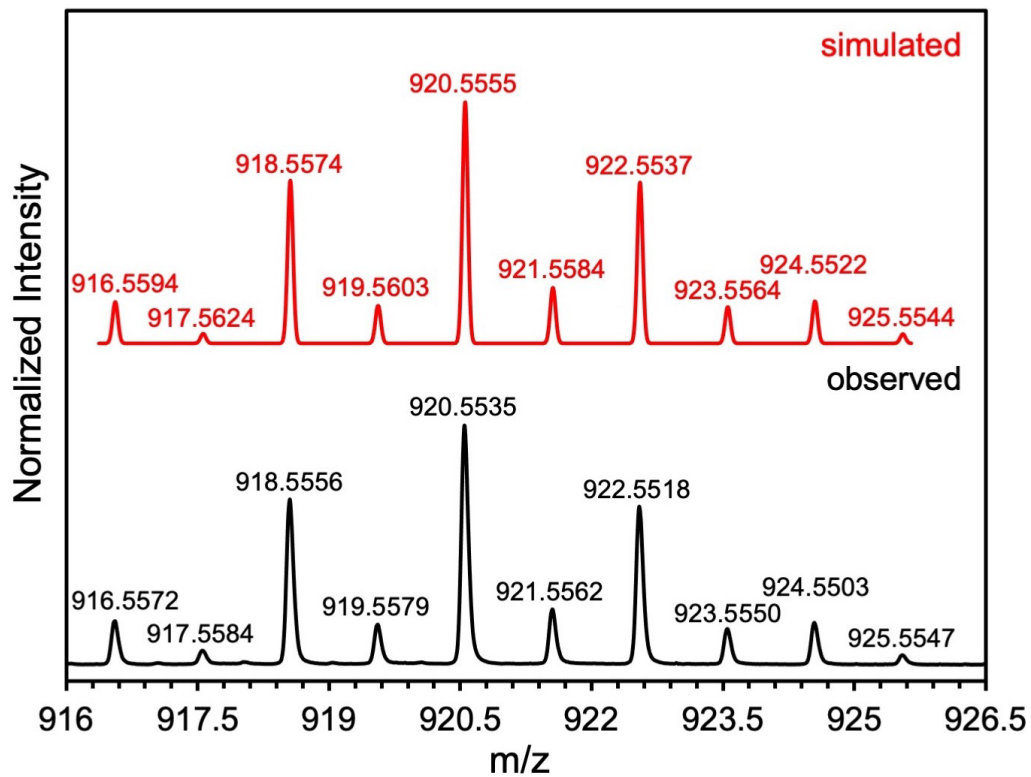

Figure S2. Observed and simulated ESI-MS spectra of 3,1-[Rh<sub>2</sub>(bhp)<sub>4</sub>].

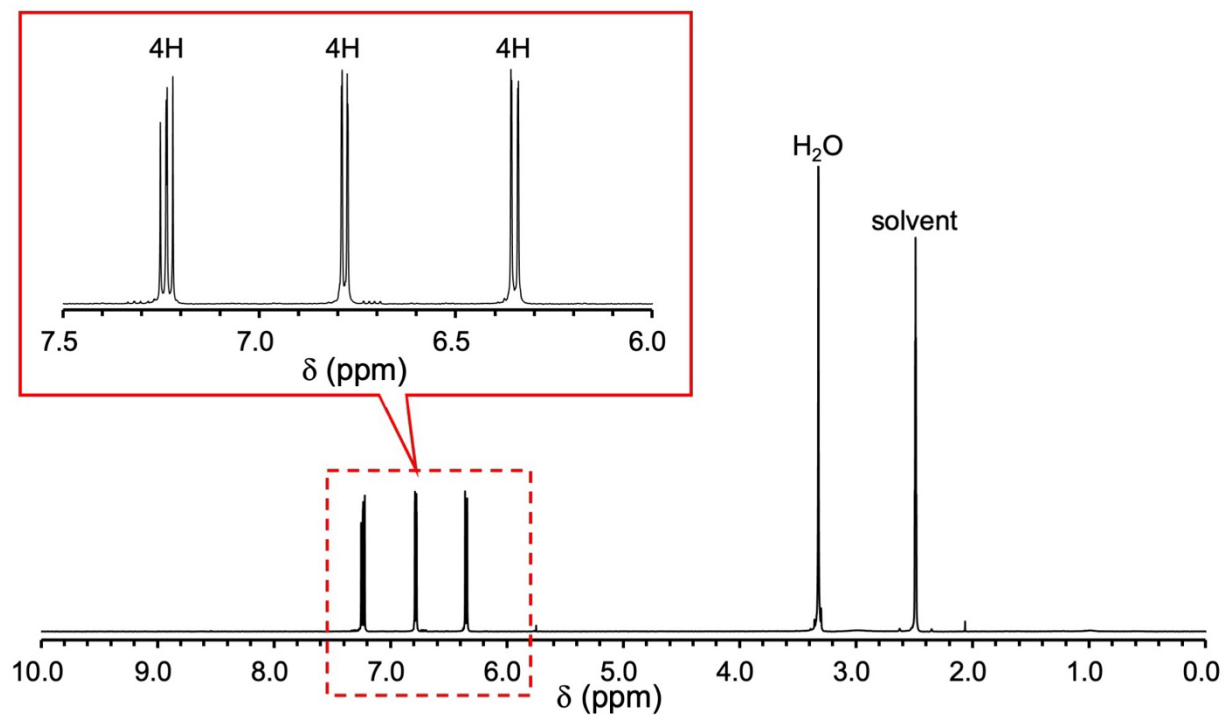

Figure S3.  $^1\text{H}$  NMR spectrum of *trans*-2,2-[Rh<sub>2</sub>(bhp)<sub>4</sub>] in DMSO-*d*<sub>6</sub>.

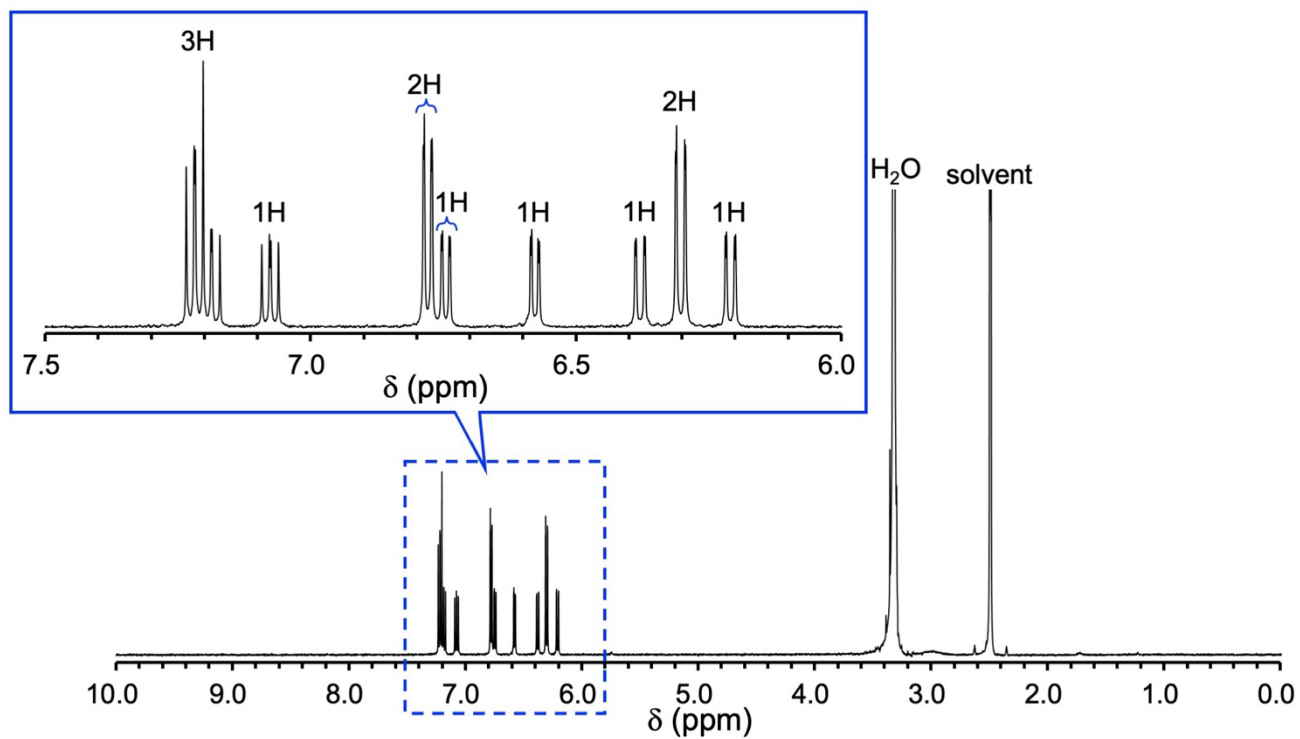

Figure S4.  $^1\text{H}$  NMR spectrum of 3,1-[Rh<sub>2</sub>(bhp)<sub>4</sub>] in DMSO-*d*<sub>6</sub>.

Table S1. Selected bond lengths (Å) and angles (°) of *trans*-2,2-[Rh<sub>2</sub>(bhp)<sub>4</sub>].

| bond lengths (Å) |           |            |          |
|------------------|-----------|------------|----------|
| Rh1-Rh2          | 2.3902(4) | C1-N1      | 1.297(5) |
| Rh1-O2           | 2.029(3)  | C1-O1      | 1.365(5) |
| Rh1-O4           | 2.023(3)  | C6-O2      | 1.298(5) |
| Rh1-N1           | 2.048(3)  | C6-N2      | 1.362(5) |
| Rh1-O3           | 2.040(3)  | C11-N3     | 1.365(5) |
| Rh2-O1           | 2.007(3)  | C11-O3     | 1.300(5) |
| Rh2-O3           | 2.023(3)  | C16-N4     | 1.363(5) |
| Rh2-N2           | 2.047(4)  | C16-O4     | 1.296(5) |
| Rh2-N4           | 2.058(4)  |            |          |
| bond angles (°)  |           |            |          |
| Rh1-Rh2-O1       | 90.66(8)  | Rh2-Rh1-O2 | 90.78(8) |
| Rh1-Rh2-O3       | 90.23(8)  | Rh2-Rh1-O4 | 89.82(8) |
| Rh1-Rh2-N2       | 86.97(10) | Rh2-Rh1-N1 | 87.33(9) |
| Rh1-Rh2-N4       | 87.91(10) | Rh2-Rh1-N3 | 87.55(9) |

Table S2. Selected bond lengths (Å) and angles (°) of 3, *I*-[Rh<sub>2</sub>(bhp)<sub>4</sub>(DMF)].

| bond lengths (Å) |            |            |           |
|------------------|------------|------------|-----------|
| Rh1-Rh2          | 2.3726(11) | Rh1-O5     | 2.173(7)  |
| Rh1-O1           | 2.026(7)   | C1-N1      | 1.385(12) |
| Rh1-O2           | 2.023(7)   | C1-O1      | 1.296(13) |
| Rh1-O3           | 2.027(6)   | C6-O2      | 1.285(13) |
| Rh1-N4           | 2.030(8)   | C6-N2      | 1.362(14) |
| Rh2-N1           | 2.054(8)   | C11-N3     | 1.360(14) |
| Rh2-N2           | 2.070(8)   | C11-O3     | 1.275(12) |
| Rh2-N3           | 2.043(9)   | C16-N4     | 1.379(13) |
| Rh2-O4           | 2.048(6)   | C16-O4     | 1.285(13) |
| bond angles (°)  |            |            |           |
| Rh1-Rh2-N1       | 86.8(2)    | Rh2-Rh1-O1 | 89.1(2)   |
| Rh1-Rh2-N2       | 86.2(2)    | Rh2-Rh1-O2 | 87.1(2)   |
| Rh1-Rh2-N3       | 85.8(2)    | Rh2-Rh1-O3 | 87.3(2)   |
| Rh1-Rh2-O4       | 85.9(2)    | Rh2-Rh1-N4 | 88.0(2)   |
| Rh2-Rh1-O5       | 173.5(2)   |            |           |

Table S3. Selected bond lengths (Å) and angles (°) of 3, *I*-[Rh<sub>2</sub>(bhp)<sub>4</sub>]<sub>2</sub>.

| bond lengths (Å) |           |            |           |
|------------------|-----------|------------|-----------|
| Rh1-Rh2          | 2.3704(4) | Rh3-Rh4    | 2.3707(5) |
| Rh1-O1           | 2.031(2)  | Rh3-O5     | 2.020(2)  |
| Rh1-O2           | 2.015(3)  | Rh3-O6     | 2.014(3)  |
| Rh1-O3           | 2.032(2)  | Rh3-O7     | 2.020(2)  |
| Rh1-N4           | 2.052(3)  | Rh3-N8     | 2.055(4)  |
| Rh2-N1           | 2.064(3)  | Rh4-N5     | 2.066(3)  |
| Rh2-N2           | 2.058(3)  | Rh4-N6     | 2.064(4)  |
| Rh2-N3           | 2.037(3)  | Rh4-N7     | 2.054(3)  |
| Rh2-O4           | 2.021(3)  | Rh4-O8     | 2.019(3)  |
| Rh1-O5           | 2.336(3)  | Rh3-O1     | 2.250(3)  |
| C1-N1            | 1.366(5)  | C21-N5     | 1.375(5)  |
| C1-O1            | 1.308(5)  | C21-O5     | 1.293(5)  |
| C6-O2            | 1.287(5)  | C26-O6     | 1.287(5)  |
| C6-N2            | 1.377(5)  | C26-N6     | 1.378(6)  |
| C11-N3           | 1.376(5)  | C31-N7     | 1.376(6)  |
| C11-O3           | 1.297(5)  | C31-O7     | 1.286(5)  |
| C16-N4           | 1.380(5)  | C36-N8     | 1.379(5)  |
| C16-O4           | 1.296(5)  | C36-O8     | 1.279(5)  |
| bond angles (°)  |           |            |           |
| Rh1-Rh2-N1       | 86.17(9)  | Rh3-Rh4-N5 | 85.83(10) |
| Rh1-Rh2-N2       | 87.24(9)  | Rh3-Rh4-N6 | 87.32(10) |
| Rh1-Rh2-N3       | 87.03(10) | Rh3-Rh4-N7 | 86.58(10) |
| Rh1-Rh2-O4       | 87.63(8)  | Rh3-Rh4-O8 | 86.61(8)  |
| Rh2-Rh1-O1       | 88.94(8)  | Rh4-Rh3-O5 | 89.36(8)  |
| Rh2-Rh1-O2       | 87.41(8)  | Rh4-Rh3-O6 | 86.46(8)  |
| Rh2-Rh1-O3       | 87.11(8)  | Rh4-Rh3-O7 | 87.17(8)  |
| Rh2-Rh1-N4       | 86.84(10) | Rh4-Rh3-N8 | 86.97(10) |
| Rh2-Rh1-O5       | 160.57(7) | Rh4-Rh3-O1 | 164.17(7) |

Table S4. Averaged bond lengths (Å) of optimized geometries of [Rh<sub>2</sub>(bhp)<sub>4</sub>] isomers.

| Isomer     | <i>4,0</i> -form |         | <i>3,1</i> -form |         | <i>cis</i> - <i>2,2</i> -form |         | <i>trans</i> - <i>2,2</i> -form |         |
|------------|------------------|---------|------------------|---------|-------------------------------|---------|---------------------------------|---------|
| spin state | singlet          | triplet | singlet          | triplet | singlet                       | triplet | singlet                         | triplet |
| Rh-Rh      | 2.390            | 2.504   | 2.407            | 2.504   | 2.413                         | 2.517   | 2.414                           | 2.498   |
| Rh-O       | 2.031            | 2.011   | 2.042            | 2.029   | 2.040                         | 2.029   | 2.042                           | 2.032   |
| Rh-N       | 2.135            | 2.150   | 2.101            | 2.115   | 2.097                         | 2.094   | 2.097                           | 2.106   |

Table S5. TDDFT results of *trans*-*2,2*-[Rh<sub>2</sub>(bhp)<sub>4</sub>] in CH<sub>2</sub>Cl<sub>2</sub>.

| Excitation States | Wavelength (nm) | Oscillator strength | Excitation characters                                                                                                                              |
|-------------------|-----------------|---------------------|----------------------------------------------------------------------------------------------------------------------------------------------------|
| S <sub>2</sub>    | 762.7           | 0.0026              | H-3[ $\pi^*(\text{Rh}_2)$ ] $\rightarrow$ L[ $\sigma^*(\text{Rh}_2)$ ] (74%), H-4[delocalized MO] $\rightarrow$ L[ $\sigma^*(\text{Rh}_2)$ ] (13%) |
| S <sub>3</sub>    | 759.8           | 0.0043              | H-2[ $\pi^*(\text{Rh}_2)$ ] $\rightarrow$ L[ $\sigma^*(\text{Rh}_2)$ ] (58%), H-5[delocalized MO] $\rightarrow$ L[ $\sigma^*(\text{Rh}_2)$ ] (29%) |
| S <sub>4</sub>    | 533.7           | 0.0001              | H-1[ $\pi(\text{bhp})$ ] $\rightarrow$ L[ $\sigma^*(\text{Rh}_2)$ ] (91%)                                                                          |
| S <sub>5</sub>    | 483.4           | 0.0002              | H[ $\delta^*(\text{Rh}_2)$ ] $\rightarrow$ L+1[ <i>anti-bonding</i> -dx <sup>2</sup> -y <sup>2</sup> (Rh <sub>2</sub> )] (75%)                     |
| S <sub>6</sub>    | 460.8           | 0.0005              | H-4[delocalized MO] $\rightarrow$ L[ $\sigma^*(\text{Rh}_2)$ ] (81%), H-3[ $\pi^*(\text{Rh}_2)$ ] $\rightarrow$ L[ $\sigma^*(\text{Rh}_2)$ ] (14%) |
| S <sub>7</sub>    | 460.0           | 0.0006              | H-5[delocalized MO] $\rightarrow$ L[ $\sigma^*(\text{Rh}_2)$ ] (63%), H-2[ $\pi^*(\text{Rh}_2)$ ] $\rightarrow$ L[ $\sigma^*(\text{Rh}_2)$ ] (32%) |
| S <sub>9</sub>    | 406.4           | 0.0004              | H-7[ $\delta(\text{Rh}_2)$ ] $\rightarrow$ L[ $\sigma^*(\text{Rh}_2)$ ] (88%)                                                                      |
| S <sub>10</sub>   | 404.0           | 0.0003              | H-8[ $\delta(\text{Rh}_2)$ ] $\rightarrow$ L[ $\sigma^*(\text{Rh}_2)$ ] (62%)                                                                      |

Table S6. TDDFT results of 3, *l*-[Rh<sub>2</sub>(bhp)<sub>4</sub>] in CH<sub>2</sub>Cl<sub>2</sub>.

| Excitation States | Wavelength (nm) | Oscillator strength | Excitation characters                                                                                                                                                                                                                                                              |
|-------------------|-----------------|---------------------|------------------------------------------------------------------------------------------------------------------------------------------------------------------------------------------------------------------------------------------------------------------------------------|
| S <sub>1</sub>    | 819.7           | 0.0001              | H[ $\delta^*(\text{Rh}_2)$ ] $\rightarrow$ L[ $\sigma^*(\text{Rh}_2)$ ] (95%)                                                                                                                                                                                                      |
| S <sub>2</sub>    | 780.3           | 0.0030              | H-2[delocalized MO] $\rightarrow$ L[ $\sigma^*(\text{Rh}_2)$ ] (48%), H-5[ $\pi^*(\text{Rh}_2)$ ] $\rightarrow$ L[ $\sigma^*(\text{Rh}_2)$ ] (24%), H-1[delocalized MO] $\rightarrow$ L[ $\sigma^*(\text{Rh}_2)$ ] (13%)                                                           |
| S <sub>3</sub>    | 750.8           | 0.0036              | H-4[ $\pi^*(\text{Rh}_2)$ ] $\rightarrow$ L[ $\sigma^*(\text{Rh}_2)$ ] (67%), H-1[ $\pi(\text{bhp})$ ] $\rightarrow$ L[ $\sigma^*(\text{Rh}_2)$ ] (14%), H-5[ $\pi^*(\text{Rh}_2)$ ] $\rightarrow$ L[ $\sigma^*(\text{Rh}_2)$ ] (13%)                                              |
| S <sub>4</sub>    | 505.8           | 0.0002              | H-3[delocalized MO] $\rightarrow$ L[ $\sigma^*(\text{Rh}_2)$ ] (52%), H-1[delocalized MO] $\rightarrow$ L[ $\sigma^*(\text{Rh}_2)$ ] (20%), H-2[delocalized MO] $\rightarrow$ L[ $\sigma^*(\text{Rh}_2)$ ] (11%)                                                                   |
| S <sub>6</sub>    | 484.9           | 0.0008              | H[ $\delta^*(\text{Rh}_2)$ ] $\rightarrow$ L[ $\sigma^*(\text{Rh}_2)$ ] (39%), H-1[delocalized MO] $\rightarrow$ L[ $\sigma^*(\text{Rh}_2)$ ] (22%)                                                                                                                                |
| S <sub>7</sub>    | 469.8           | 0.0011              | H-5[ $\pi^*(\text{Rh}_2)$ ] $\rightarrow$ L[ $\sigma^*(\text{Rh}_2)$ ] (51%), H-2[delocalized MO] $\rightarrow$ L[ $\sigma^*(\text{Rh}_2)$ ] (26%)                                                                                                                                 |
| S <sub>8</sub>    | 440.6           | 0.0001              | H[ $\delta^*(\text{Rh}_2)$ ] $\rightarrow$ L+4[delocalized MO] (23%), H[ $\delta^*(\text{Rh}_2)$ ] $\rightarrow$ L+5[delocalized MO] (14%), H[ $\delta^*(\text{Rh}_2)$ ] $\rightarrow$ L+6[bonding-dx <sup>2</sup> -y <sup>2</sup> (Rh <sub>2</sub> )/ $\pi^*(\text{bhp})$ ] (20%) |
| S <sub>9</sub>    | 424.4           | 0.0004              | H-7[ $\delta(\text{Rh}_2)$ ] $\rightarrow$ L[ $\sigma^*(\text{Rh}_2)$ ] (39%), H-6[d(Rh <sub>2</sub> )] $\rightarrow$ L[ $\sigma^*(\text{Rh}_2)$ ] (30%), H-8[ $\pi(\text{Rh}_2)$ ] $\rightarrow$ L[ $\sigma^*(\text{Rh}_2)$ ] (14%)                                               |
| S <sub>10</sub>   | 404.8           | 0.0003              | H-8[ $\pi(\text{Rh}_2)$ ] $\rightarrow$ L[ $\sigma^*(\text{Rh}_2)$ ] (34%), H-4[ $\pi^*(\text{Rh}_2)$ ] $\rightarrow$ L+1[anti-bonding-dx <sup>2</sup> -y <sup>2</sup> (Rh <sub>2</sub> )] (12%), H-6[d(Rh <sub>2</sub> )] $\rightarrow$ L[ $\sigma^*(\text{Rh}_2)$ ] (11%)        |

Table S7. TDDFT results of 3, *l*-[Rh<sub>2</sub>(bhp)<sub>4</sub>] in DMF.

| Excitation States | Wavelength (nm) | Oscillator strength | Excitation characters                                                                                                                                                                                                                                                                                                                               |
|-------------------|-----------------|---------------------|-----------------------------------------------------------------------------------------------------------------------------------------------------------------------------------------------------------------------------------------------------------------------------------------------------------------------------------------------------|
| S <sub>1</sub>    | 607.7           | 0.0016              | H-1[ $\pi^*(\text{Rh}_2)$ ] $\rightarrow$ L[ $\sigma^*(\text{Rh}_2)$ ] (78%)                                                                                                                                                                                                                                                                        |
| S <sub>2</sub>    | 602.5           | 0.0039              | H-2[ $\pi^*(\text{Rh}_2)$ ] $\rightarrow$ L[ $\sigma^*(\text{Rh}_2)$ ] (82%)                                                                                                                                                                                                                                                                        |
| S <sub>3</sub>    | 555.5           | 0.0001              | H[ $\delta^*(\text{Rh}_2)$ ] $\rightarrow$ L[ $\sigma^*(\text{Rh}_2)$ ] (95%)                                                                                                                                                                                                                                                                       |
| S <sub>4</sub>    | 497.9           | 0.0005              | H[ $\delta^*(\text{Rh}_2)$ ] $\rightarrow$ L+1[anti-bonding-dx <sup>2</sup> -y <sup>2</sup> (Rh <sub>2</sub> )] (63%), H[ $\delta^*(\text{Rh}_2)$ ] $\rightarrow$ L+6[d(Rh <sub>2</sub> )/ $\pi(\text{bhp})$ ] (12%)                                                                                                                                |
| S <sub>5</sub>    | 444.8           | 0.0001              | H[ $\delta^*(\text{Rh}_2)$ ] $\rightarrow$ L+2[delocalized MO] (26%), H[ $\delta^*(\text{Rh}_2)$ ] $\rightarrow$ L+5[bonding-dx <sup>2</sup> -y <sup>2</sup> (Rh <sub>2</sub> )/ $\pi^*(\text{bhp})$ ] (16%), H-6[ $\pi(\text{bhp})$ /d(Rh <sub>2</sub> )] $\rightarrow$ L+1[anti-bonding-dx <sup>2</sup> -y <sup>2</sup> (Rh <sub>2</sub> )] (10%) |
| S <sub>6</sub>    | 423.3           | 0.0003              | H-1[ $\pi^*(\text{Rh}_2)$ ] $\rightarrow$ L+1[anti-bonding-dx <sup>2</sup> -y <sup>2</sup> (Rh <sub>2</sub> )] (44%)                                                                                                                                                                                                                                |
| S <sub>8</sub>    | 411.7           | 0.0009              | H-3[ $\pi(\text{bhp})$ /d(Rh <sub>2</sub> )] $\rightarrow$ L[ $\sigma^*(\text{Rh}_2)$ ] (46%), H-1[ $\pi^*(\text{Rh}_2)$ ] $\rightarrow$ L+1[anti-bonding-dx <sup>2</sup> -y <sup>2</sup> (Rh <sub>2</sub> )] (12%), H-2[ $\pi^*(\text{Rh}_2)$ ] $\rightarrow$ L+1[anti-bonding-dx <sup>2</sup> -y <sup>2</sup> (Rh <sub>2</sub> )] (11%)           |

Table S8. TDDFT results of 3, *I*-[Rh<sub>2</sub>(bhp)<sub>4</sub>] in gas phase.

| Excitation States | Wavelength (nm) | Oscillator strength | Excitation characters                                                                                                                                                                                                                                                                                                                                                                                                                    |
|-------------------|-----------------|---------------------|------------------------------------------------------------------------------------------------------------------------------------------------------------------------------------------------------------------------------------------------------------------------------------------------------------------------------------------------------------------------------------------------------------------------------------------|
| S <sub>1</sub>    | 665.7           | 0.0064              | H-3[ $\pi^*(\text{Rh}_2)$ ] $\rightarrow$ L[ $\sigma^*(\text{Rh}_2)$ ] (37%), H-1[ $\delta^*(\text{Rh}_2)$ ] $\rightarrow$ L[ $\sigma^*(\text{Rh}_2)$ ] (12%),<br>H-8[d(Rh <sub>2</sub> )/ $\pi$ (bhp)] $\rightarrow$ L+1[ $\sigma^*(\text{Rh}_2)$ ] (10%), H-6[ $\pi^*(\text{Rh}_2)$ ] $\rightarrow$ L+1[ $\sigma^*(\text{Rh}_2)$ ] (10%),<br>H-4[ $\pi^*(\text{Rh}_2)$ ] $\rightarrow$ L+1[ $\sigma^*(\text{Rh}_2)$ ] (10%)            |
| S <sub>2</sub>    | 663.0           | 0.0009              | H-6[ $\pi^*(\text{Rh}_2)$ ] $\rightarrow$ L[ $\sigma^*(\text{Rh}_2)$ ] (24%), H-3[ $\pi^*(\text{Rh}_2)$ ] $\rightarrow$ L+1[ $\sigma^*(\text{Rh}_2)$ ] (24%),<br>H-8[d(Rh <sub>2</sub> )/ $\pi$ (bhp)] $\rightarrow$ L[ $\sigma^*(\text{Rh}_2)$ ] (16%)                                                                                                                                                                                  |
| S <sub>3</sub>    | 649.7           | 0.0014              | H-4[ $\pi^*(\text{Rh}_2)$ ] $\rightarrow$ L[ $\sigma^*(\text{Rh}_2)$ ] (31%), H-9[ $\pi^*(\text{Rh}_2)$ ] $\rightarrow$ L+1[ $\sigma^*(\text{Rh}_2)$ ] (18%),<br>H-6[ $\pi^*(\text{Rh}_2)$ ] $\rightarrow$ L[ $\sigma^*(\text{Rh}_2)$ ] (16%), H[ $\delta^*(\text{Rh}_2)$ ] $\rightarrow$ L[ $\sigma^*(\text{Rh}_2)$ ] (10%)                                                                                                             |
| S <sub>4</sub>    | 641.7           | 0.0007              | H-9[ $\pi^*(\text{Rh}_2)$ ] $\rightarrow$ L[ $\sigma^*(\text{Rh}_2)$ ] (27%), H-4[ $\pi^*(\text{Rh}_2)$ ] $\rightarrow$ L+1[ $\sigma^*(\text{Rh}_2)$ ] (24%),<br>H-6[ $\pi^*(\text{Rh}_2)$ ] $\rightarrow$ L+1[ $\sigma^*(\text{Rh}_2)$ ] (13%)                                                                                                                                                                                          |
| S <sub>5</sub>    | 630.2           | 0.0004              | H[ $\delta^*(\text{Rh}_2)$ ] $\rightarrow$ L[ $\sigma^*(\text{Rh}_2)$ ] (49%), H-1[ $\delta^*(\text{Rh}_2)$ ] $\rightarrow$ L+1[ $\sigma^*(\text{Rh}_2)$ ] (34%)                                                                                                                                                                                                                                                                         |
| S <sub>6</sub>    | 628.6           | 0.0001              | H-1[ $\delta^*(\text{Rh}_2)$ ] $\rightarrow$ L[ $\sigma^*(\text{Rh}_2)$ ] (51%), H[ $\delta^*(\text{Rh}_2)$ ] $\rightarrow$ L+1[ $\sigma^*(\text{Rh}_2)$ ] (32%)                                                                                                                                                                                                                                                                         |
| S <sub>7</sub>    | 504.0           | 0.0019              | H-1[ $\delta^*(\text{Rh}_2)$ ] $\rightarrow$ L+2[ <i>anti-bonding</i> -dx <sup>2</sup> -y <sup>2</sup> (Rh <sub>2</sub> )] (19%), H[ $\delta^*(\text{Rh}_2)$ ] $\rightarrow$ L+1[ $\sigma^*(\text{Rh}_2)$ ] (17%),<br>H[ $\delta^*(\text{Rh}_2)$ ] $\rightarrow$ L+3[ <i>anti-bonding</i> -dx <sup>2</sup> -y <sup>2</sup> (Rh <sub>2</sub> )] (16%)                                                                                     |
| S <sub>8</sub>    | 503.6           | 0.0003              | H-1[ $\delta^*(\text{Rh}_2)$ ] $\rightarrow$ L+3[ <i>anti-bonding</i> -dx <sup>2</sup> -y <sup>2</sup> (Rh <sub>2</sub> )] (19%), H-1[ $\delta^*(\text{Rh}_2)$ ] $\rightarrow$ L+1[ $\sigma^*(\text{Rh}_2)$ ] (17%)<br>H[ $\delta^*(\text{Rh}_2)$ ] $\rightarrow$ L+2[ <i>anti-bonding</i> -dx <sup>2</sup> -y <sup>2</sup> (Rh <sub>2</sub> )] (18%)                                                                                    |
| S <sub>10</sub>   | 457.4           | 0.0016              | H[ $\delta^*(\text{Rh}_2)$ ] $\rightarrow$ L+1[ $\sigma^*(\text{Rh}_2)$ ] (35%), H-1[ $\delta^*(\text{Rh}_2)$ ] $\rightarrow$ L[ $\sigma^*(\text{Rh}_2)$ ] (21%),<br>H[ $\delta^*(\text{Rh}_2)$ ] $\rightarrow$ L+3[ <i>anti-bonding</i> -dx <sup>2</sup> -y <sup>2</sup> (Rh <sub>2</sub> )] (11%)                                                                                                                                      |
| S <sub>11</sub>   | 456.7           | 0.0003              | H-1[ $\delta^*(\text{Rh}_2)$ ] $\rightarrow$ L+1[ $\sigma^*(\text{Rh}_2)$ ] (27%), H[ $\delta^*(\text{Rh}_2)$ ] $\rightarrow$ L[ $\sigma^*(\text{Rh}_2)$ ] (14%),<br>H-2[ $\pi$ (bhp)] $\rightarrow$ L[ $\sigma^*(\text{Rh}_2)$ ] (11%)                                                                                                                                                                                                  |
| S <sub>12</sub>   | 454.6           | 0.0002              | H-5[ $\pi$ (bhp)] $\rightarrow$ L[ $\sigma^*(\text{Rh}_2)$ ] (35%), H-2[ $\pi$ (bhp)] $\rightarrow$ L+1[ $\sigma^*(\text{Rh}_2)$ ] (34%),<br>H-7[ $\pi$ (bhp)] $\rightarrow$ L[ $\sigma^*(\text{Rh}_2)$ ] (11%)                                                                                                                                                                                                                          |
| S <sub>15</sub>   | 429.6           | 0.0015              | H-3[ $\pi^*(\text{Rh}_2)$ ] $\rightarrow$ L[ $\sigma^*(\text{Rh}_2)$ ] (38%), H-4[ $\pi^*(\text{Rh}_2)$ ] $\rightarrow$ L+1[ $\sigma^*(\text{Rh}_2)$ ] (19%)                                                                                                                                                                                                                                                                             |
| S <sub>17</sub>   | 420.9           | 0.0027              | H-9[ $\pi^*(\text{Rh}_2)$ ] $\rightarrow$ L[ $\sigma^*(\text{Rh}_2)$ ] (16%), H-8[d(Rh <sub>2</sub> )/ $\pi$ (bhp)] $\rightarrow$ L+1[ $\sigma^*(\text{Rh}_2)$ ] (16%),<br>H-7[ $\pi$ (bhp)] $\rightarrow$ L[ $\sigma^*(\text{Rh}_2)$ ] (15%)                                                                                                                                                                                            |
| S <sub>18</sub>   | 420.6           | 0.0005              | H-8[d(Rh <sub>2</sub> )/ $\pi$ (bhp)] $\rightarrow$ L[ $\sigma^*(\text{Rh}_2)$ ] (22%), H-9[ $\pi^*(\text{Rh}_2)$ ] $\rightarrow$ L+1[ $\sigma^*(\text{Rh}_2)$ ] (14%)                                                                                                                                                                                                                                                                   |
| S <sub>19</sub>   | 408.7           | 0.004               | H-11[d(Rh <sub>2</sub> )/ $\pi$ (bhp)] $\rightarrow$ L[ $\sigma^*(\text{Rh}_2)$ ] (16%), H-4[ $\pi^*(\text{Rh}_2)$ ] $\rightarrow$ L+3[ <i>anti-bonding</i> -dx <sup>2</sup> -y <sup>2</sup> (Rh <sub>2</sub> )] (15%),<br>H-3[ $\pi^*(\text{Rh}_2)$ ] $\rightarrow$ L+2[ <i>anti-bonding</i> -dx <sup>2</sup> -y <sup>2</sup> (Rh <sub>2</sub> )] (13%)                                                                                 |
| S <sub>21</sub>   | 404.7           | 0.0023              | H-6[ $\pi^*(\text{Rh}_2)$ ] $\rightarrow$ L+1[ $\sigma^*(\text{Rh}_2)$ ] (22%), H-9[ $\pi^*(\text{Rh}_2)$ ] $\rightarrow$ L[ $\sigma^*(\text{Rh}_2)$ ] (13%),<br>H-6[ $\pi^*(\text{Rh}_2)$ ] $\rightarrow$ L+3[ <i>anti-bonding</i> -dx <sup>2</sup> -y <sup>2</sup> (Rh <sub>2</sub> )] (11%)                                                                                                                                           |
| S <sub>22</sub>   | 401.3           | 0.0002              | H-10[d(Rh <sub>2</sub> )/ $\pi$ (bhp)] $\rightarrow$ L[ $\sigma^*(\text{Rh}_2)$ ] (17%), H-4[ $\pi^*(\text{Rh}_2)$ ] $\rightarrow$ L+2[ <i>anti-bonding</i> -dx <sup>2</sup> -y <sup>2</sup> (Rh <sub>2</sub> )] (14%),<br>H-3[ $\pi^*(\text{Rh}_2)$ ] $\rightarrow$ L+3[ <i>anti-bonding</i> -dx <sup>2</sup> -y <sup>2</sup> (Rh <sub>2</sub> )] (12%), H-3[ $\pi^*(\text{Rh}_2)$ ] $\rightarrow$ L+1[ $\sigma^*(\text{Rh}_2)$ ] (10%) |
